# Supplementary material for: Tuning the optical and dielectric properties of calcium copper titanate CaxCu3−xTi4O12 nanopowders
Source: Royal Society of Chemistry journal article supplement (doi:10.1039/c4ra15222k), 2015-01-01
Supplement: c4ra15222k1.pdf [file c4ra15222k1.pdf]

## Tuning optical and dielectric properties of calcium copper titanate $\text{Ca}_x\text{Cu}_{3-x}\text{Ti}_4\text{O}_{12}$ nanopowders

*Ali Omar Turkey, Mohamed Mohamed Rashad, Zaki Ismail Zaki, Ibrahim Ahmed Ibrahim,  
Mikhael Bechelany*

### S11. XRD patterns of CCTO nanopowders

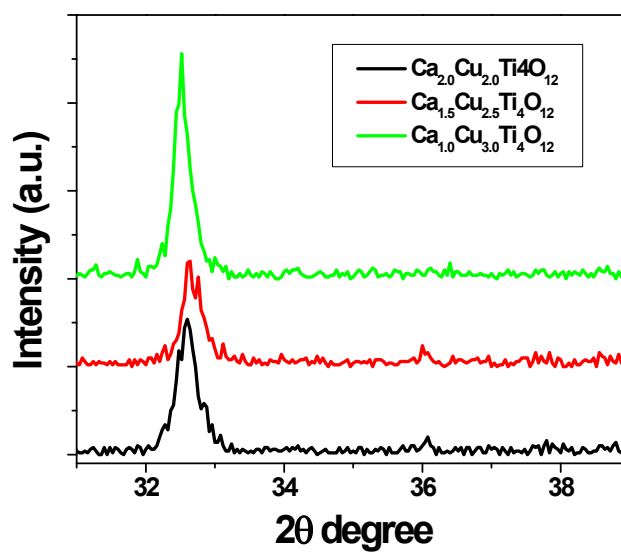

**Fig. S1** XRD patterns of CCTO nanopowders with different  $\text{Ca}^{2+}$  ion content 1.0, 1.5, and 2.0

**SI2. Optical properties of CCTO nanopowders**

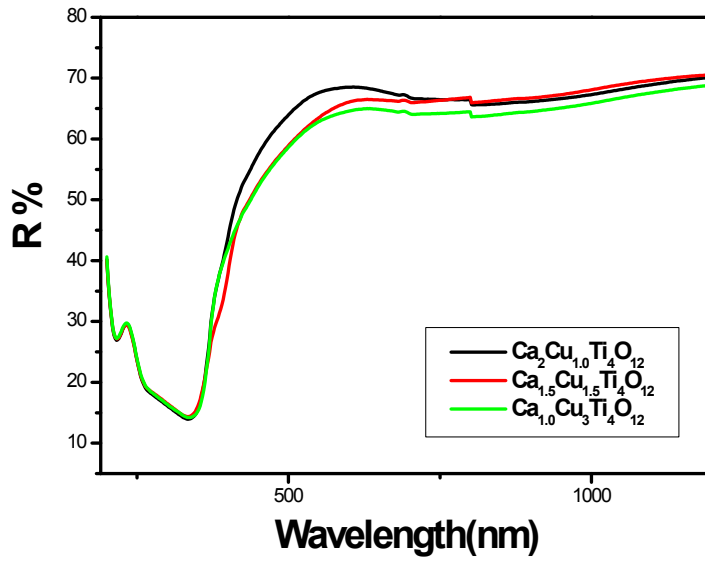

**Fig. SI2** UV-visible reflectance spectrum (R%) of  $(\text{Ca}_x\text{Cu}_{3-x}\text{Ti}_4\text{O}_{12})$  nanopowders
